# Supplementary material for: Genetic Characterization in High-Risk Individuals from a Low-Resource City of Peru
Source: MDPI journal article supplement (doi:10.3390/cancers14225603), 2022-11-15
Supplement: s1 [file s1]

# Supplementary Material: Genetic Characterization in High-Risk Individuals from a Low-Resource City of Peru

Elizabeth Zavaleta, Nelly Solis, Maria Isabel Palacios, Liz Elva Zevallos-Escobar, Edison Vasquez Corales, Juan Carlos Bazo-Alvarez, Constantino Dominguez-Barrera, Anthony Campos, Patrik Wernhoff, Per Olaf Ekström, Pål Møller, Tina Visnovska, Eivind Hovig, Janina Balazar-Palacios, Karin Alvarez-Valenzuela, Sigve Nakken and Mev Dominguez-Valentin

**Supplementary figure S1.** Family pedigree where the proband carried the variant *BRCA1* (ENST00000471181.2) c.4357+1G>A.

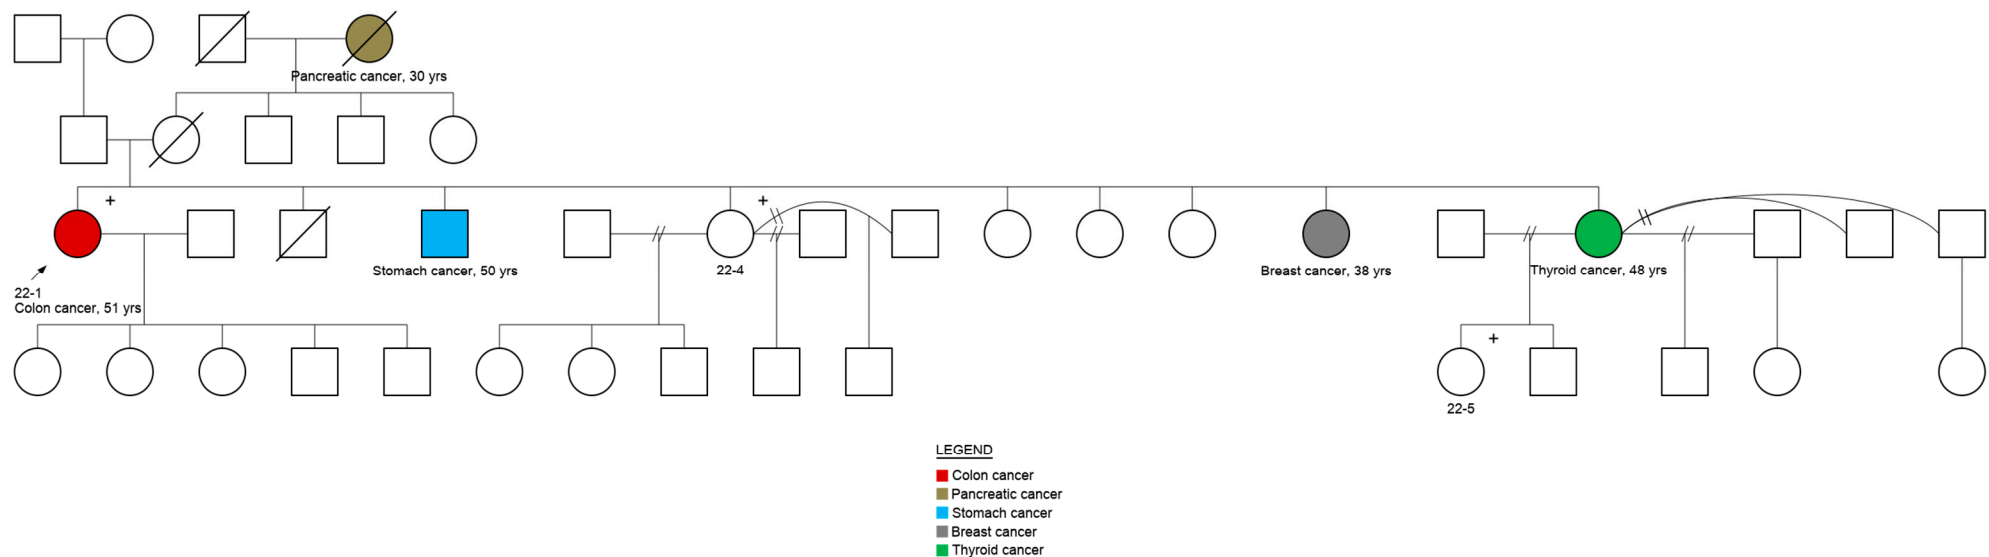

+: Carrier of *BRCA1* (ENST00000471181.2) c.4357+1G>A variant.

**Supplementary Table S1.** Summary of various quality metrics related to the primary analysis of the 84 analysed NGS samples.

| SampleID  | TotalReadCount | MarkedDuplicatesCount | MarkedDuplicates (%) | UniqueMappedCount | UniqueMapped (%) | MAPQ>39Count | MAPQ>39% | TargetMeanCoverage | SmallVariantsCount |
|-----------|----------------|-----------------------|----------------------|-------------------|------------------|--------------|----------|--------------------|--------------------|
| SAMPLE_01 | 4306702        | 808172                | 18.77                | 3494143           | 81.13            | 4072617      | 94.56    | 329.26             | 1352               |
| SAMPLE_02 | 5422346        | 1218150               | 22.47                | 4198994           | 77.44            | 5121517      | 94.45    | 407.48             | 1435               |
| SAMPLE_03 | 4136992        | 780680                | 18.87                | 3351539           | 81.01            | 3888460      | 93.99    | 324.00             | 1287               |
| SAMPLE_04 | 4217184        | 819023                | 19.42                | 3395240           | 80.51            | 3988817      | 94.58    | 330.65             | 1434               |
| SAMPLE_05 | 3154060        | 510588                | 16.19                | 2641272           | 83.74            | 2974170      | 94.30    | 256.87             | 1426               |
| SAMPLE_06 | 3667028        | 666226                | 18.17                | 2996904           | 81.73            | 3484546      | 95.02    | 296.26             | 1425               |
| SAMPLE_07 | 4286010        | 832490                | 19.42                | 3449507           | 80.48            | 4041816      | 94.30    | 335.17             | 1338               |
| SAMPLE_08 | 4400140        | 850979                | 19.34                | 3544581           | 80.56            | 4172516      | 94.83    | 344.74             | 1419               |
| SAMPLE_09 | 3858364        | 707594                | 18.34                | 3146318           | 81.55            | 3638934      | 94.31    | 306.46             | 1356               |
| SAMPLE_10 | 3988152        | 761105                | 19.08                | 3223256           | 80.82            | 3762974      | 94.35    | 310.24             | 1339               |
| SAMPLE_11 | 4537970        | 946067                | 20.85                | 3587637           | 79.06            | 4288345      | 94.50    | 347.24             | 1294               |
| SAMPLE_12 | 5362140        | 1244115               | 23.20                | 4112643           | 76.70            | 5084934      | 94.83    | 398.73             | 1412               |
| SAMPLE_13 | 5410000        | 1355376               | 25.05                | 4048529           | 74.83            | 5228801      | 96.65    | 406.85             | 1369               |
| SAMPLE_14 | 4472046        | 946908                | 21.17                | 3520519           | 78.72            | 4253573      | 95.11    | 345.48             | 1449               |
| SAMPLE_15 | 4752614        | 1035745               | 21.79                | 3712154           | 78.11            | 4502667      | 94.74    | 362.38             | 1407               |
| SAMPLE_16 | 3537878        | 629622                | 17.80                | 2904750           | 82.10            | 3321152      | 93.87    | 278.68             | 1295               |
| SAMPLE_17 | 4839334        | 1073494               | 22.18                | 3760264           | 77.70            | 4572859      | 94.49    | 364.52             | 1405               |
| SAMPLE_18 | 4707644        | 1166239               | 24.77                | 3536926           | 75.13            | 4452290      | 94.58    | 335.19             | 1212               |
| SAMPLE_19 | 4363940        | 991754                | 22.73                | 3366396           | 77.14            | 4210221      | 96.48    | 343.78             | 1410               |
| SAMPLE_20 | 4392822        | 885992                | 20.17                | 3502380           | 79.73            | 4155814      | 94.60    | 339.47             | 1358               |
| SAMPLE_21 | 4147762        | 900059                | 21.70                | 3241837           | 78.16            | 4015566      | 96.81    | 338.09             | 1267               |
| SAMPLE_22 | 4825444        | 1060434               | 21.98                | 3760443           | 77.93            | 4585233      | 95.02    | 366.01             | 1282               |
| SAMPLE_23 | 5860556        | 1671934               | 28.53                | 4183130           | 71.38            | 5494262      | 93.75    | 395.39             | 1197               |
| SAMPLE_24 | 5067370        | 1255720               | 24.78                | 3806225           | 75.11            | 4901888      | 96.73    | 393.60             | 1388               |
| SAMPLE_25 | 3363226        | 670952                | 19.95                | 2688266           | 79.93            | 3254142      | 96.76    | 290.19             | 1396               |
| SAMPLE_26 | 3458826        | 613676                | 17.74                | 2841369           | 82.15            | 3335661      | 96.44    | 271.70             | 1338               |
| SAMPLE_27 | 3695812        | 674941                | 18.26                | 3018316           | 81.67            | 3482143      | 94.22    | 291.02             | 1344               |
| SAMPLE_28 | 4989922        | 1280004               | 25.65                | 3704665           | 74.24            | 4817971      | 96.55    | 384.11             | 1368               |
| SAMPLE_29 | 4485526        | 947248                | 21.12                | 3534256           | 78.79            | 4264763      | 95.08    | 344.69             | 1424               |
| SAMPLE_30 | 5039630        | 1152117               | 22.86                | 3882771           | 77.04            | 4785938      | 94.97    | 377.40             | 1518               |
| SAMPLE_31 | 4235578        | 821213                | 19.39                | 3410728           | 80.53            | 3987354      | 94.14    | 323.62             | 1283               |
| SAMPLE_32 | 4177210        | 845637                | 20.24                | 3326007           | 79.62            | 3951943      | 94.61    | 319.53             | 1402               |
| SAMPLE_33 | 5701898        | 1583567               | 27.77                | 4112106           | 72.12            | 5372858      | 94.23    | 390.83             | 1260               |
| SAMPLE_34 | 4870290        | 1042338               | 21.40                | 3823458           | 78.51            | 4612145      | 94.70    | 370.58             | 1368               |
| SAMPLE_35 | 4002138        | 751960                | 18.79                | 3245440           | 81.09            | 3770873      | 94.22    | 313.51             | 1296               |
| SAMPLE_36 | 5393030        | 1416734               | 26.27                | 3966695           | 73.55            | 5096465      | 94.50    | 377.37             | 1240               |
| SAMPLE_37 | 4041608        | 762968                | 18.88                | 3274249           | 81.01            | 3823807      | 94.61    | 312.94             | 1360               |
| SAMPLE_38 | 5399666        | 1477613               | 27.36                | 3916460           | 72.53            | 5095500      | 94.37    | 367.92             | 1235               |

|           |         |         |       |         |       |         |       |        |      |
|-----------|---------|---------|-------|---------|-------|---------|-------|--------|------|
| SAMPLE_39 | 3919572 | 875210  | 22.33 | 3042270 | 77.62 | 3691856 | 94.19 | 291.95 | 1293 |
| SAMPLE_40 | 4332984 | 892022  | 20.59 | 3436977 | 79.32 | 4104886 | 94.74 | 334.20 | 1393 |
| SAMPLE_41 | 3971380 | 781224  | 19.67 | 3186209 | 80.23 | 3775194 | 95.06 | 313.85 | 1380 |
| SAMPLE_42 | 3732816 | 681963  | 18.27 | 3047544 | 81.64 | 3543952 | 94.94 | 295.02 | 1336 |
| SAMPLE_43 | 3729244 | 686417  | 18.41 | 3040168 | 81.52 | 3516194 | 94.29 | 294.79 | 1391 |
| SAMPLE_44 | 4124460 | 859458  | 20.84 | 3259705 | 79.03 | 3980052 | 96.50 | 331.44 | 1372 |
| SAMPLE_45 | 5512724 | 1493879 | 27.10 | 4012552 | 72.79 | 5193536 | 94.21 | 375.35 | 1244 |
| SAMPLE_46 | 4138582 | 966148  | 23.34 | 3165224 | 76.48 | 4009129 | 96.87 | 333.86 | 1405 |
| SAMPLE_47 | 3538128 | 620712  | 17.54 | 2913541 | 82.35 | 3344114 | 94.52 | 281.04 | 1352 |
| SAMPLE_48 | 4655008 | 1119190 | 24.04 | 3530653 | 75.85 | 4506732 | 96.81 | 370.56 | 1398 |
| SAMPLE_49 | 4057396 | 851084  | 20.98 | 3202842 | 78.94 | 3912648 | 96.43 | 301.14 | 1317 |
| SAMPLE_50 | 5203538 | 1297771 | 24.94 | 3899184 | 74.93 | 5037737 | 96.81 | 406.83 | 1322 |
| SAMPLE_51 | 4869284 | 1268279 | 26.05 | 3595657 | 73.84 | 4708973 | 96.71 | 369.68 | 1425 |
| SAMPLE_52 | 3748462 | 796364  | 21.25 | 2948236 | 78.65 | 3630872 | 96.86 | 315.76 | 1403 |
| SAMPLE_53 | 4503968 | 1057702 | 23.48 | 3440000 | 76.38 | 4352802 | 96.64 | 355.35 | 1367 |
| SAMPLE_54 | 1847982 | 294654  | 15.94 | 1550856 | 83.92 | 1786735 | 96.69 | 168.79 | 1343 |
| SAMPLE_55 | 4747334 | 1181833 | 24.89 | 3558987 | 74.97 | 4594479 | 96.78 | 358.84 | 1285 |
| SAMPLE_56 | 5811628 | 1595324 | 27.45 | 4208612 | 72.42 | 5626443 | 96.81 | 433.62 | 1419 |
| SAMPLE_57 | 2693326 | 458770  | 17.03 | 2231811 | 82.86 | 2602974 | 96.65 | 237.62 | 1351 |
| SAMPLE_58 | 3412974 | 692539  | 20.29 | 2715589 | 79.57 | 3293492 | 96.50 | 285.83 | 1283 |
| SAMPLE_59 | 3538404 | 669174  | 18.91 | 2865978 | 81.00 | 3416385 | 96.55 | 279.16 | 1230 |
| SAMPLE_60 | 5020500 | 1332814 | 26.55 | 3682305 | 73.35 | 4867239 | 96.95 | 380.88 | 1303 |
| SAMPLE_61 | 4798092 | 1180693 | 24.61 | 3608026 | 75.20 | 4628447 | 96.46 | 359.22 | 1386 |
| SAMPLE_62 | 4089686 | 880592  | 21.53 | 3204073 | 78.35 | 3945953 | 96.49 | 318.64 | 1340 |
| SAMPLE_63 | 4095102 | 935844  | 22.85 | 3153206 | 77.00 | 3964662 | 96.81 | 334.22 | 1291 |
| SAMPLE_64 | 5846254 | 1461675 | 25.00 | 4376723 | 74.86 | 5652672 | 96.69 | 428.66 | 1288 |
| SAMPLE_65 | 5366774 | 1425054 | 26.55 | 3933705 | 73.30 | 5195364 | 96.81 | 409.48 | 1362 |
| SAMPLE_66 | 2328898 | 341598  | 14.67 | 1984426 | 85.21 | 2251353 | 96.67 | 208.85 | 1296 |
| SAMPLE_67 | 6109638 | 1701443 | 27.85 | 4401148 | 72.04 | 5903595 | 96.63 | 455.12 | 1316 |
| SAMPLE_68 | 4722916 | 1144064 | 24.22 | 3573003 | 75.65 | 4558605 | 96.52 | 364.47 | 1358 |
| SAMPLE_69 | 6218248 | 1779750 | 28.62 | 4432586 | 71.28 | 5866692 | 94.35 | 418.83 | 1207 |
| SAMPLE_70 | 4310554 | 882439  | 20.47 | 3424267 | 79.44 | 4089256 | 94.87 | 335.73 | 1347 |
| SAMPLE_71 | 3937946 | 753770  | 19.14 | 3180169 | 80.76 | 3730536 | 94.73 | 312.18 | 1346 |
| SAMPLE_72 | 4986154 | 1284257 | 25.76 | 3698744 | 74.18 | 4707392 | 94.41 | 352.87 | 1314 |
| SAMPLE_73 | 4061440 | 777417  | 19.14 | 3279642 | 80.75 | 3841684 | 94.59 | 320.33 | 1419 |
| SAMPLE_74 | 4405010 | 1063782 | 24.15 | 3337005 | 75.75 | 4162780 | 94.50 | 319.51 | 1263 |
| SAMPLE_75 | 5071674 | 1341029 | 26.44 | 3725592 | 73.46 | 4766355 | 93.98 | 352.68 | 1234 |
| SAMPLE_76 | 4143456 | 753477  | 18.18 | 3384536 | 81.68 | 3976468 | 95.97 | 309.01 | 1346 |
| SAMPLE_77 | 5138396 | 1201933 | 23.39 | 3930057 | 76.48 | 4953834 | 96.41 | 377.95 | 1279 |
| SAMPLE_78 | 4782692 | 1027324 | 21.48 | 3749082 | 78.39 | 4611111 | 96.41 | 360.89 | 1331 |
| SAMPLE_79 | 4838792 | 946789  | 19.57 | 3886423 | 80.32 | 4631115 | 95.71 | 343.38 | 1354 |

|                  |         |         |       |         |       |         |       |        |      |
|------------------|---------|---------|-------|---------|-------|---------|-------|--------|------|
| <b>SAMPLE_80</b> | 4014524 | 805358  | 20.06 | 3204160 | 79.81 | 3868949 | 96.37 | 317.23 | 1354 |
| <b>SAMPLE_81</b> | 5525118 | 1478170 | 26.75 | 4040892 | 73.14 | 5349764 | 96.83 | 417.73 | 1320 |
| <b>SAMPLE_82</b> | 3579440 | 644938  | 18.02 | 2930753 | 81.88 | 3376713 | 94.34 | 288.06 | 1412 |
| <b>SAMPLE_83</b> | 3252646 | 533731  | 16.41 | 2716705 | 83.52 | 3070473 | 94.40 | 258.97 | 1387 |
| <b>SAMPLE_84</b> | 5332234 | 1431476 | 26.85 | 3895773 | 73.06 | 5043888 | 94.59 | 371.97 | 1310 |

The columns contain the following information: (1) SampleID, (2) total count of the sequenced reads, (3) number of reads marked as duplicates, (4) duplicates as a proportion of the total number of sequenced reads, (5) number of mapped reads without duplicates, (6) proportion of non-duplicated reads in the total number of sequenced reads, (7) number of reads mapping to the reference genome with MAPQ at least 40, (8) proportion of the MAPQ40 and above reads in the total number of sequenced reads, (9) mean depth of coverage in the targeted regions, (10) number of called small variants.
